# Supplementary material for: Endocannabinoid Modulation Using Monoacylglycerol Lipase Inhibition in Tourette Syndrome: A Phase 1 Randomized, Placebo-Controlled Study
Source: PubMed Central journal article supplement — Pharmacopsychiatry. 2021 Nov 30;55(3):148–56. doi: 10.1055/a-1675-3494 (PMC9110099; doi:10.1055/a-1675-3494), 2021-11-30
Supplement: 10-1055-a-1675-3494-2021-05-1031.pdf [file 10-1055-a-1675-3494-2021-05-1031.pdf]

## Supplementary Material

### Endocannabinoid Modulation using Monoacylglycerol Lipase Inhibition in Tourette Syndrome: A phase 1 Randomized, Placebo-controlled Study

Kirsten R. Müller-Vahl<sup>1</sup>, Carolin Fremer<sup>1</sup>, Chan Beals<sup>2</sup>, Jelena Ivkovic<sup>3</sup>, Henrik Loft<sup>3</sup> and Christoph Schindler<sup>4</sup>

- 1) Department of Psychiatry, Social Psychiatry and Psychotherapy, Hannover Medical School, Hannover, Germany
- 2) Abide Therapeutics, San Diego, CA, USA
- 3) H. Lundbeck A/S, Valby, Denmark
- 4) Clinical Research Center Core Facility, Hannover Medical School, Hannover, Germany.

[Mueller-Vahl.Kirsten@mh-hannover.de](mailto:Mueller-Vahl.Kirsten@mh-hannover.de)

#### Description of the Time Weighted Analysis (TWA) model.

Efficacy endpoints were analyzed using a mixed model repeated measures (MMRM)-model including all time points. Details of the model structure are given below.

The model provides treatment estimates at each of the time points M4 (4 h), M8 (8 h), and M12 (12 h) and is also used to calculate the Time Weighted Average (TWA) using the following trapezoidal formula:

$$TWA = ((4 - 0) * \frac{M0 + M4}{2} + (8 - 4) * \frac{M4 + M8}{2} + (12 - 8) * \frac{M8 + M12}{2}) / 12 = 0.3333 * M4 + 0.3333 * M8 + 0.1667 * M12$$

**Supplemental Table e1** Group mean plasma parameters following 40 mg oral administration of Lu AG06466 in the fasted state (Part A) in 19 participants

|                           | <b>T<sub>max</sub></b><br><b>(h)</b> | <b>C<sub>max</sub></b><br><b>(ng/mL)</b> | <b>AUC<sub>0-8</sub></b><br><b>(h*ng/mL)</b> | <b>AUC<sub>last</sub></b><br><b>(h*ng/mL)</b> |
|---------------------------|--------------------------------------|------------------------------------------|----------------------------------------------|-----------------------------------------------|
| <b>Mean</b>               | 2.14                                 | 59.5                                     | 269                                          | 393                                           |
| <b>SD</b>                 | 1.03                                 | 23.6                                     | 97.4                                         | 149                                           |
| <b>CV%</b>                | 48.0                                 | 39.7                                     | 36.2                                         | 37.8                                          |
| <b>Min</b>                | 1.13                                 | 25.2                                     | 121                                          | 164                                           |
| <b>Median</b>             | 1.68                                 | 59.7                                     | 227                                          | 343                                           |
| <b>Max</b>                | 3.97                                 | 107                                      | 439                                          | 629                                           |
| <b>Geometric Mean</b>     | 1.94                                 | 55.0                                     | 253                                          | 366                                           |
| <b>CV% Geometric Mean</b> | 46.6                                 | 43.6                                     | 38.3                                         | 40.4                                          |

C<sub>max</sub> = maximum plasma concentration; AUC<sub>0-8</sub> = area under the plasma concentration versus time curve from time 0 to 8 hours; AUC<sub>last</sub> = area under the plasma concentration versus time curve from time 0 to last timepoint; CV = coefficient of variation; h = hour; max = maximum; min = minimum; SD = standard deviation; T<sub>max</sub> = time to maximum plasma concentration.

**Supplemental Table e2** Group mean plasma parameters following 20 mg oral administration of Lu AG06466 after a high-fat meal (Part B) in seven participants

|                           | <b>T<sub>max</sub></b><br><b>(h)</b> | <b>C<sub>max</sub></b><br><b>(ng/mL)</b> | <b>AUC<sub>0-8</sub></b><br><b>(h*ng/mL)</b> | <b>AUC<sub>last</sub></b><br><b>(h*ng/mL)</b> |
|---------------------------|--------------------------------------|------------------------------------------|----------------------------------------------|-----------------------------------------------|
| <b>Mean</b>               | 5.71                                 | 89.8                                     | 344                                          | 751                                           |
| <b>SD</b>                 | 2.93                                 | 40.7                                     | 99.4                                         | 306                                           |
| <b>CV%</b>                | 51.2                                 | 45.3                                     | 28.9                                         | 40.8                                          |
| <b>Min</b>                | 2.00                                 | 36.7                                     | 242                                          | 415                                           |
| <b>Median</b>             | 8.00                                 | 79.9                                     | 334                                          | 697                                           |
| <b>Max</b>                | 8.00                                 | 161                                      | 532                                          | 1330                                          |
| <b>Geometric Mean</b>     | 4.88                                 | 81.8                                     | 333                                          | 704                                           |
| <b>CV% Geometric Mean</b> | 73.8                                 | 51.3                                     | 27.9                                         | 39.7                                          |

C<sub>max</sub> = maximum plasma concentration; AUC<sub>0-8</sub> = area under the plasma concentration versus time curve from time 0 to 8 hours; AUC<sub>last</sub> = area under the plasma concentration versus time curve from time 0 to last timepoint; CV = coefficient of variation; h = hour; max = maximum; min = minimum; SD = standard deviation; T<sub>max</sub> = time to maximum plasma concentration.
